# Supplementary material for: Efficacy of epetraborole against Mycobacteroides abscessus in a mouse model of lung infection
Source: PubMed Central journal article supplement (PMC11323969; doi:10.1128/aac.00648-24), 2024-07-17
Supplement: aac.00648-24-s0001.pdf [file aac.00648-24-s0001.pdf]

## SUPPLEMENTAL INFORMATION

### Efficacy of epetraborole against *M. abscessus* in a mouse model of lung disease

Binayak Rimal<sup>a</sup>, Christopher K. Lippincott<sup>a,b</sup>, Chandra M. Panthi<sup>a</sup>, Yi Xie<sup>a</sup>, Tiffany R. Keepers<sup>c</sup>, MRK Alley<sup>c</sup>, Gyanu Lamichhane<sup>a,b</sup>

<sup>a</sup>Division of Infectious Diseases, Department of Medicine, School of Medicine, Johns Hopkins University, Baltimore, MD 21287, USA. <sup>b</sup>Center for Nontuberculous Mycobacteria and Bronchiectasis, School of Medicine, Johns Hopkins University, Baltimore, MD 21287, USA. <sup>c</sup>AN2 Therapeutics, Inc. Menlo Park, CA 94027, USA.

## SUPPLEMENTARY FIGURES AND TABLES

|            |                                                                                                                               |     |
|------------|-------------------------------------------------------------------------------------------------------------------------------|-----|
| Consensus  | VLETQHDATDTAELPRHRYTAQLAGQIERRWQQTWADRGT FHVVPNVGSLAPT DGTPI PADKMFVQDMFPYPSPGDGLHVGHPLGYIATDVYARFHRMRGANV LHALGFDAFGLPAEQYAV | 120 |
| 19977_LeuS | VLETQHDATDTAELPRHRYTAQLAGQIERRWQQTWADRGT FHVVPNVGSLAPT DGTPI PADKMFVQDMFPYPSPGDGLHVGHPLGYIATDVYARFHRMRGANV LHALGFDAFGLPAEQYAV | 120 |
| M9507_LeuS | VLETQHDATDTAELPRHRYTAQLAGQIERRWQQTWADRGT FHVVPNVGSLAPT DGTPI PADKMFVQDMFPYPSPGDGLHVGHPLGYIATDVYARFHRMRGANV LHALGFDAFGLPAEQYAV | 120 |
| M9529_LeuS | VLETQHDATDTAELPRHRYTAQLAGQIERRWQQTWADRGT FHVVPNVGSLAPT DGTPI PADKMFVQDMFPYPSPGDGLHVGHPLGYIATDVYARFHRMRGANV LHALGFDAFGLPAEQYAV | 120 |
| Consensus  | QTGTHPRVTRTEANIVNYKRQLGRLGLGHSRRSFATT DVDFYKWTQWIFLQIYNAWYDEQARRARPIQELIAEFDSGTRAPSDGTVWAE LSVGARADVIDSYRLVYQSDSVVNWCPGLGT    | 240 |
| 19977_LeuS | QTGTHPRVTRTEANIVNYKRQLGRLGLGHSRRSFATT DVDFYKWTQWIFLQIYNAWYDEQARRARPIQELIAEFDSGTRAPSDGTVWAE LSVGARADVIDSYRLVYQSDSVVNWCPGLGT    | 240 |
| M9507_LeuS | QTGTHPRVTRTEANIVNYKRQLGRLGLGHSRRSFATT DVDFYKWTQWIFLQIYNAWYDEQARRARPIQELIAEFDSGTRAPSDGTVWAE LSVGARADVIDSYRLVYQSDSVVNWCPGLGT    | 240 |
| M9529_LeuS | QTGTHPRVTRTEANIVNYKRQLGRLGLGHSRRSFATT DVDFYKWTQWIFLQIYNAWYDEQARRARPIQELIAEFDSGTRAPSDGTVWAE LSVGARADVIDSYRLVYQSDSVVNWCPGLGT    | 240 |
| Consensus  | VLANEEVTADGRSERGNFVFRKRLRQWMMRITAYS DRLIDDLVDLWDPKVKTMQRNWIGRSQGASV LFGAPGVGDIEVFTTRPDTLFGATY MVLAPHEPLVDQLAADVWPQDADPRWT     | 360 |
| 19977_LeuS | VLANEEVTADGRSERGNFVFRKRLRQWMMRITAYS DRLIDDLVDLWDPKVKTMQRNWIGRSQGASV LFGAPGVGDIEVFTTRPDTLFGATY MVLAPHEPLVDQLAADVWPQDADPRWT     | 360 |
| M9507_LeuS | VLANEEVTADGRSERGNFVFRKRLRQWMMRITAYS DRLIDDLVDLWDPKVKTMQRNWIGRSQGASV LFGAPGVGDIEVFTTRPDTLFGATY MVLAPHEPLVDQLAADVWPQDADPRWT     | 360 |
| M9529_LeuS | VLANEEVTADGRSERGNFVFRKRLRQWMMRITAYS DRLIDDLVDLWDPKVKTMQRNWIGRSQGASV LFGAPGVGDIEVFTTRPDTLFGATY MVLAPHEPLVDQLAADVWPQDADPRWT     | 360 |
| Consensus  | GGQDSPRAAIEQYRRSIAAKS DLERQENKEKTGVFTGAYATN FVSGKFPVPVFIADYVLLGYGTGAIMAVPGHDQRDWFANT FGLFVQEVISGGDVTKAA YTDGGLVNSDYLDGLDIEA   | 480 |
| 19977_LeuS | GGQDSPRAAIEQYRRSIAAKS DLERQENKEKTGVFTGAYATN FVSGKFPVPVFIADYVLLGYGTGAIMAVPGHDQRDWFANT FGLFVQEVISGGDVTKAA YTDGGLVNSDYLDGLDIEA   | 480 |
| M9507_LeuS | GGQDSPRAAIEQYRRSIAAKS DLERQENKEKTGVFTGAYATN FVSGKFPVPVFIADYVLLGYGTGAIMAVPGHDQRDWFANT FGLFVQEVISGGDVTKAA YTDGGLVNSDYLDGLDIEA   | 480 |
| M9529_LeuS | GGQDSPRAAIEQYRRSIAAKS DLERQENKEKTGVFTGAYATN FVSGKFPVPVFIADYVLLGYGTGAIMAVPGHDQRDWFANT FGLFVQEVISGGDVTKAA YTDGGLVNSDYLDGLDIEA   | 480 |
| Consensus  | AKVEVTRRLVKDGRGESRIEYKLRDWFARQRYWGE PFPVIVYDEDRPRALGENVLPVELPEVEDYAPV SFDPPDASSEPSPLSKAADWVNV ELDLGDGLKHYTRDTNVMPOWAGSSWY     | 600 |
| 19977_LeuS | AKVEVTRRLVKDGRGESRIEYKLRDWFARQRYWGE PFPVIVYDEDRPRALGENVLPVELPEVEDYAPV SFDPPDASSEPSPLSKAADWVNV ELDLGDGLKHYTRDTNVMPOWAGSSWY     | 600 |
| M9507_LeuS | AKVEVTRRLVKDGRGESRIEYKLRDWFARQRYWGE PFPVIVYDEDRPRALGENVLPVELPEVEDYAPV SFDPPDASSEPSPLSKAADWVNV ELDLGDGLKHYTRDTNVMPOWAGSSWY     | 600 |
| M9529_LeuS | AKVEVTRRLVKDGRGESRIEYKLRDWFARQRYWGE PFPVIVYDEDRPRALGENVLPVELPEVEDYAPV SFDPPDASSEPSPLSKAADWVNV ELDLGDGLKHYTRDTNVMPOWAGSSWY     | 600 |
| Consensus  | ELRYADPDNAEAFCDKENEAYWLGPRPAEHGPNDP GGVDLYVGGMEHAVLHLLYSRFWHRKVL YDLGHVSSREPYRRLNQGYIQA HAYTDARGMYVPAAEVTEENKFFYQGA EVQQEFG   | 720 |
| 19977_LeuS | ELRYADPDNAEAFCDKENEAYWLGPRPAEHGPNDP GGVDLYVGGMEHAVLHLLYSRFWHRKVL YDLGHVSSREPYRRLNQGYIQA HAYTDARGMYVPAAEVTEENKFFYQGA EVQQEFG   | 720 |
| M9507_LeuS | ELRYADPDNAEAFCDKENEAYWLGPRPAEHGPNDP GGVDLYVGGMEHAVLHLLYSRFWHRKVL YDLGHVSSREPYRRLNQGYIQA HAYTDARGMYVPAAEVTEENKFFYQGA EVQQEFG   | 720 |
| M9529_LeuS | ELRYADPDNAEAFCDKENEAYWLGPRPAEHGPNDP GGVDLYVGGMEHAVLHLLYSRFWHRKVL YDLGHVSSREPYRRLNQGYIQA HAYTDARGMYVPAAEVTEENKFFYQGA EVQQEFG   | 720 |
| Consensus  | KIGKSLKNSISPDDICDNYGADTLRVYEMSMGPLE LSRPWATKDVVGAHRFLQRAWRVVDEETGKIRV TDDLTSEDTLRALHKT IAGVTEDYAALRNNTAA AKLIEYTNHLTKDYPEG    | 840 |
| 19977_LeuS | KIGKSLKNSISPDDICDNYGADTLRVYEMSMGPLE LSRPWATKDVVGAHRFLQRAWRVVDEETGKIRV TDDLTSEDTLRALHKT IAGVTEDYAALRNNTAA AKLIEYTNHLTKDYPEG    | 840 |
| M9507_LeuS | KIGKSLKNSISPDDICDNYGADTLRVYEMSMGPLE LSRPWATKDVVGAHRFLQRAWRVVDEETGKIRV TDDLTSEDTLRALHKT IAGVTEDYAALRNNTAA AKLIEYTNHLTKDYPEG    | 840 |
| M9529_LeuS | KIGKSLKNSISPDDICDNYGADTLRVYEMSMGPLE LSRPWATKDVVGAHRFLQRAWRVVDEETGKIRV TDDLTSEDTLRALHKT IAGVTEDYAALRNNTAA AKLIEYTNHLTKDYPEG    | 840 |
| Consensus  | APRAAVEPLVLM L APLAPHLAEELNSLLGRDDSL AHGFFPESDDRVLVADTVEYPIQVNGKVRGRITVA ADAPKGDIEAAALTEEKVLE FLA GATPKKVI VVPGRMVNLV         | 951 |
| 19977_LeuS | APRAAVEPLVLM L APLAPHLAEELNSLLGRDDSL AHGFFPESDDRVLVADTVEYPIQVNGKVRGRITVA ADAPKGDIEAAALTEEKVLE FLA GATPKKVI VVPGRMVNLV         | 951 |
| M9507_LeuS | APRAAVEPLVLM L APLAPHLAEELNSLLGRDDSL AHGFFPESDDRVLVADTVEYPIQVNGKVRGRITVA ADAPKGDIEAAALTEEKVLE FLA GATPKKVI VVPGRMVNLV         | 951 |
| M9529_LeuS | APRAAVEPLVLM L APLAPHLAEELNSLLGRDDSL AHGFFPESDDRVLVADTVEYPIQVNGKVRGRITVA ADAPKGDIEAAALTEEKVLE FLA GATPKKVI VVPGRMVNLV         | 951 |

**Figure S1:** Alignment of LeuS sequences in *M. abscessus* reference strain ATCC 19977, and clinical isolates M9507 and M9529. Compared to LeuS in ATCC 19977, LeuS in M9507 and M9529 harbor A315V and T355A substitutions.

**Table S1:** MIC of eptaborole (EBO) against nine *M. abscessus* and a *M. peregrinum* isolate.

| Isolate ID | Subspecies         | Biological Replicate #1 |                        | Mean MIC (µg/ml) | Biological Replicate #2 |                        | Mean MIC (µg/ml) | Overall Mean MIC (µg/ml) |
|------------|--------------------|-------------------------|------------------------|------------------|-------------------------|------------------------|------------------|--------------------------|
|            |                    | MIC (µg/ml)             |                        |                  | MIC (µg/ml)             |                        |                  |                          |
|            |                    | Technical Replicate #1  | Technical Replicate #2 |                  | Technical Replicate #1  | Technical Replicate #2 |                  |                          |
| ATCC 19977 | <i>abscessus</i>   | 0.0625                  | 0.0625                 | 0.0625           | 0.0625                  | 0.0625                 | 0.0625           | 0.0625                   |
| M9501      | <i>abscessus</i>   | 0.0625                  | 0.0625                 | 0.0625           | 0.0625                  | 0.0625                 | 0.0625           | 0.0625                   |
| M9503      | <i>abscessus</i>   | 0.0625                  | 0.0625                 | 0.0625           | 0.0625                  | 0.0625                 | 0.0625           | 0.0625                   |
| M9507      | <i>abscessus</i>   | >2                      | >2                     | >2               | >2                      | >2                     | >2               | >2                       |
| M9529      | <i>abscessus</i>   | 1                       | 1                      | 1                | 1                       | 1                      | 1                | 1                        |
| M9530      | <i>abscessus</i>   | 0.0625                  | 0.0625                 | 0.0625           | 0.0625                  | 0.0625                 | 0.0625           | 0.0625                   |
| M9502      | <i>massiliense</i> | 0.0625                  | 0.0625                 | 0.0625           | 0.0625                  | 0.0625                 | 0.0625           | 0.0625                   |
| M9509      | <i>massiliense</i> | 0.0313                  | 0.0313                 | 0.0313           | 0.0313                  | 0.0313                 | 0.0313           | 0.0313                   |
| M9514      | <i>massiliense</i> | 0.0625                  | 0.0625                 | 0.0625           | 0.0625                  | 0.0625                 | 0.0625           | 0.0625                   |
| 700686     | <i>peregrinum</i>  | 0.125                   | 0.125                  | 0.125            | 0.125                   | 0.125                  | 0.125            | 0.125                    |

Minimum inhibitory concentration (MIC) of EBO was determined against six *M. abscessus* subspecies *abscessus*, and three *M. abscessus* subspecies *massiliense*. *Mycobacterium peregrinum* ATCC 700686 was included as an internal control comparator. MIC of EBO from two biological repeats and two technical repeats are shown. The final column shows the overall mean MIC calculated from the four MIC determinations shown in columns three, four, six and seven.

**Table S2:** Mean *M. abscessus* CFU burden in the lungs of mice in different treatment groups.

| <i>M. abscessus</i> isolate | Figure panel in manuscript | Treatment Group | Mean <i>M. abscessus</i> CFU burden in the lungs (Log <sub>10</sub> ) |         |         |
|-----------------------------|----------------------------|-----------------|-----------------------------------------------------------------------|---------|---------|
|                             |                            |                 | Week +1                                                               | Week +2 | Week +4 |
| ATCC 19977                  | 1A                         | PBS             | 5.11                                                                  | 4.90    | 5.25    |
|                             |                            | IMI             | 3.05                                                                  | 2.73    | 2.13    |
|                             |                            | EBO 25          | 3.66                                                                  | 3.86    | 2.97    |
|                             |                            | EBO 50          | 3.88                                                                  | 3.44    | 2.93    |
| M9501                       | 1B                         | PBS             | 4.71                                                                  | 5.47    | 6.68    |
|                             |                            | IMI             | 3.18                                                                  | 2.68    | 1.63    |
|                             |                            | EBO 25          | 4.15                                                                  | 4.16    | 2.71    |
|                             |                            | EBO 50          | 3.98                                                                  | 3.52    | 2.92    |
| M9530                       | 1C                         | PBS             | 4.92                                                                  | 5.37    | 7.18    |
|                             |                            | IMI             | 3.55                                                                  | 2.64    | 2.00    |
|                             |                            | EBO 25          | 3.92                                                                  | 3.62    | 3.47    |
|                             |                            | EBO 50          | 4.19                                                                  | 3.49    | 2.20    |
| M9501                       | 2                          | PBS             | 4.95                                                                  | n/a     | 5.84    |
|                             |                            | IMI             | 3.68                                                                  | n/a     | 2.34    |
|                             |                            | EBO 0.5         | 4.90                                                                  | n/a     | 5.40    |
|                             |                            | EBO 5           | 4.81                                                                  | n/a     | 4.14    |
|                             |                            | EBO 10          | 4.72                                                                  | n/a     | 4.01    |
|                             |                            | EBO 25          | 4.31                                                                  | n/a     | 2.42    |
|                             |                            | EBO 100         | 3.81                                                                  | n/a     | 1.83    |

Mean burden of *M. abscessus* isolates ATCC 19977, M9501 and M9530 in the lungs of mice at the conclusion of one-, two- and four-weeks of treatment (represent as week +1, +2 and +4) are shown.  $n=5$  mice per treatment group at week +1 and +2, and  $n=10$  mice per treatment group at week +4. PBS: 1x phosphate-buffered-saline, pH 7.4. IMI: imipenem, 100 mg/kg\*dose, dosed twice daily. EBO 0.5: epetraborole, 0.5 mg/kg, once daily. EBO 5: epetraborole, 5 mg/kg, once daily. EBO 10: epetraborole, 10 mg/kg, once daily. EBO 25: epetraborole, 25 mg/kg, once daily. EBO 50: epetraborole, 50 mg/kg, once daily. EBO 100: epetraborole, 100 mg/kg, once daily. n/a: not applicable as week +2 timepoint was not included for this specific assessment.

**Table S3:** Statistical assessment of *M. abscessus* burden in the lungs of mice between groups of mice receiving different treatments.

| <i>M. abscessus</i> isolate | Treatment Group     | <i>p</i> -value from <i>t</i> -Test: Two-Sample Assuming Unequal Variances (P(T<=t) one-tail) |                                |         |                                |         |                                |
|-----------------------------|---------------------|-----------------------------------------------------------------------------------------------|--------------------------------|---------|--------------------------------|---------|--------------------------------|
|                             |                     | Week +1                                                                                       | <i>p</i> -value interpretation | Week +2 | <i>p</i> -value interpretation | Week +4 | <i>p</i> -value interpretation |
| ATCC 19977                  | PBS vs. IMI         | 0.001                                                                                         | **                             | <0.001  | **                             | <0.001  | **                             |
|                             | PBS vs. EBO 25      | 0.004                                                                                         | **                             | 0.019   | *                              | 0.001   | **                             |
|                             | PBS vs. EBO 50      | <0.001                                                                                        | **                             | <0.001  | **                             | <0.001  | **                             |
|                             | IMI vs. EBO 25      | 0.091                                                                                         | ns                             | 0.017   | *                              | 0.018   | *                              |
|                             | IMI vs. EBO 50      | 0.022                                                                                         | *                              | 0.029   | *                              | 0.013   | *                              |
|                             | EBO 25 vs. EBO 50   | 0.257                                                                                         | ns                             | 0.163   | ns                             | 0.459   | ns                             |
| M9501                       | PBS vs. IMI         | 0.031                                                                                         | *                              | <0.001  | **                             | <0.001  | **                             |
|                             | PBS vs. EBO 25      | 0.235                                                                                         | ns                             | 0.015   | *                              | <0.001  | **                             |
|                             | PBS vs. EBO 50      | 0.157                                                                                         | ns                             | 0.002   | **                             | <0.001  | **                             |
|                             | IMI vs. EBO 25      | 0.044                                                                                         | *                              | 0.010   | **                             | 0.006   | **                             |
|                             | IMI vs. EBO 50      | 0.035                                                                                         | *                              | 0.070   | ns                             | 0.002   | **                             |
|                             | EBO 25 vs. EBO 50   | 0.382                                                                                         | ns                             | 0.108   | ns                             | 0.334   | ns                             |
| M9530                       | PBS vs. IMI         | 0.016                                                                                         | *                              | 0.001   | **                             | <0.001  | **                             |
|                             | PBS vs. EBO 25      | 0.055                                                                                         | ns                             | 0.006   | **                             | <0.001  | **                             |
|                             | PBS vs. EBO 50      | 0.081                                                                                         | ns                             | 0.004   | **                             | <0.001  | **                             |
|                             | IMI vs. EBO 25      | 0.229                                                                                         | ns                             | 0.045   | *                              | <0.001  | **                             |
|                             | IMI vs. EBO 50      | 0.056                                                                                         | ns                             | 0.058   | ns                             | 0.183   | ns                             |
|                             | EBO 25 vs. EBO 50   | 0.266                                                                                         | ns                             | 0.398   | ns                             | <0.001  | **                             |
| M9501                       | PBS vs. IMI         | 0.014                                                                                         | *                              | n/a     | n/a                            | <0.001  | **                             |
|                             | PBS vs. EBO 0.5     | 0.458                                                                                         | ns                             | n/a     | n/a                            | 0.228   | ns                             |
|                             | PBS vs. EBO 5       | 0.396                                                                                         | ns                             | n/a     | n/a                            | 0.228   | ns                             |
|                             | PBS vs. EBO 10      | 0.332                                                                                         | ns                             | n/a     | n/a                            | 0.001   | **                             |
|                             | PBS vs. EBO 25      | 0.083                                                                                         | ns                             | n/a     | n/a                            | <0.001  | **                             |
|                             | PBS vs. EBO 100     | 0.018                                                                                         | *                              | n/a     | n/a                            | <0.001  | **                             |
|                             | IMI vs. EBO 0.5     | 0.011                                                                                         | *                              | n/a     | n/a                            | <0.001  | **                             |
|                             | IMI vs. EBO 5       | 0.015                                                                                         | *                              | n/a     | n/a                            | <0.001  | **                             |
|                             | IMI vs. EBO 10      | 0.020                                                                                         | *                              | n/a     | n/a                            | <0.001  | **                             |
|                             | IMI vs. EBO 25      | 0.025                                                                                         | *                              | n/a     | n/a                            | 0.346   | ns                             |
|                             | IMI vs. EBO 100     | 0.325                                                                                         | ns                             | n/a     | n/a                            | 0.007   | **                             |
|                             | EBO 0.5 vs. EBO 5   | 0.435                                                                                         | ns                             | n/a     | n/a                            | 0.011   | *                              |
|                             | EBO 0.5 vs. EBO 10  | 0.366                                                                                         | ns                             | n/a     | n/a                            | 0.005   | **                             |
|                             | EBO 0.5 vs. EBO 25  | 0.085                                                                                         | ns                             | n/a     | n/a                            | <0.001  | **                             |
|                             | EBO 0.5 vs. EBO 100 | 0.017                                                                                         | *                              | n/a     | n/a                            | <0.001  | **                             |
|                             | EBO 5 vs. EBO 10    | 0.430                                                                                         | ns                             | n/a     | n/a                            | 0.350   | ns                             |
|                             | EBO 5 vs. EBO 25    | 0.115                                                                                         | ns                             | n/a     | n/a                            | <0.001  | **                             |
|                             | EBO 5 vs. EBO 100   | 0.023                                                                                         | *                              | n/a     | n/a                            | <0.001  | **                             |
|                             | EBO 10 vs. EBO 25   | 0.151                                                                                         | ns                             | n/a     | n/a                            | <0.001  | **                             |
|                             | EBO 10 vs. EBO 100  | 0.030                                                                                         | *                              | n/a     | n/a                            | <0.001  | **                             |
| EBO 25 vs. EBO 100          | 0.026               | *                                                                                             | n/a                            | n/a     | 0.008                          | **      |                                |

Results of two tailed *t*-test of *M. abscessus* burdens in the lungs of mice in different treatment and infection groups at 1-, 2- and 4-week timepoints are shown. The mean *M. abscessus* lung burdens at 0-, 1-, 2- and 4-week timepoints following treatment are illustrated in Figures 1 and 2 of the manuscript. *n*=5 mice per treatment group at week +1 and +2, and *n*=10 mice per treatment group at week +4. Column 1 lists the infecting *M. abscessus* isolate. Column 2 lists the pairs of treatment groups within the study. PBS: 1x phosphate-buffered-saline, pH 7.4. IMI: imipenem, 100 mg/kg\*dose, dosed twice daily. EBO 0.5: epetaborole, 0.5 mg/kg, once daily. EBO 5: epetaborole, 5 mg/kg, once daily. EBO 10: epetaborole, 10 mg/kg, once daily. EBO 25: epetaborole, 25 mg/kg, once daily. EBO 50: epetaborole, 50 mg/kg, once daily. EBO 100: epetaborole, 100 mg/kg, once daily. n/a: not applicable as week +2 timepoint was not included for this specific assessment. \* represents *p*-value ≤0.05, and \*\* represents *p*-value of ≤0.01, and were interpreted as significant. “ns” represents a *p*-value >0.05 that was interpreted as not significant.
